# Supplementary material
Source: Springer Nature journal article supplement (https://www.springermedizin.de/resource/supplementary/12887_2012_675_MOESM1_ESM.pdf/9475462)
Supplement: MOESM1 [file 9475462]

The more rapid the tempo, the faster the hormone change

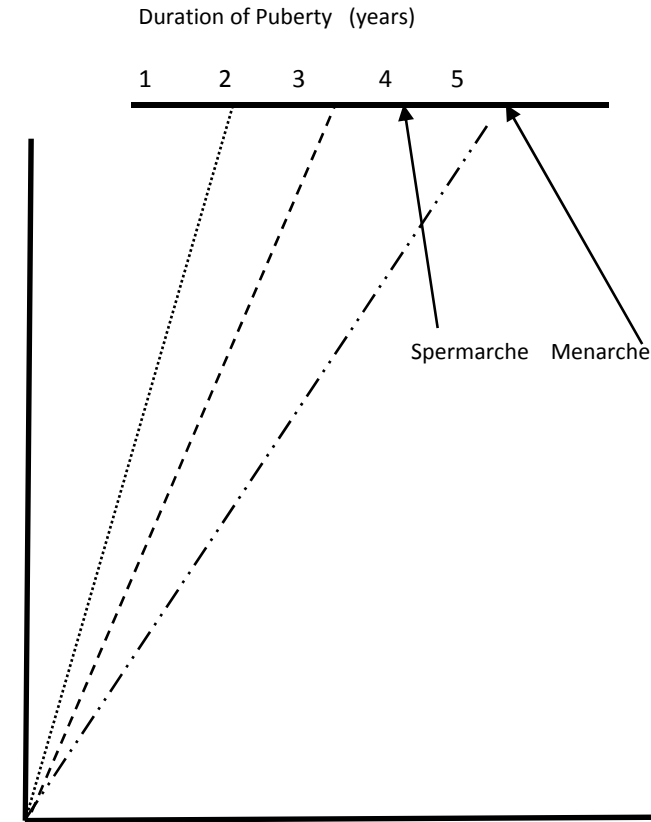

O = onset of puberty (between 8 and 13 years)

The relationship between onset and duration is not known.

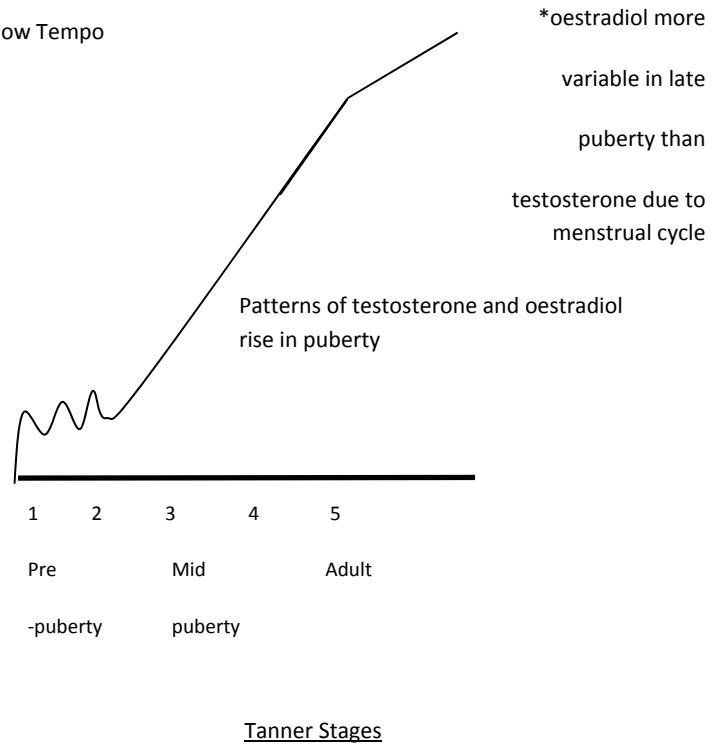

Tanner Stages are measured by direct examination or self
